# Supplementary material for: Self-Management for Knee Osteoarthritis: A Systematic Review and Meta-Analysis of Randomized Controlled Trials
Source: Hindawi journal article supplement (doi:10.1155/2022/2681240), 2022-03-02
Supplement: f1 [file 2681240.f1.zip]

## Supplementary Appendix - Search algorithm

### Medline(through Pubmed)

- |    |                                                                                                                                                                                                                                                                                                                                                                                                                                                                                                                                                                                                                                                                                                                                                                                                                                                                                                                                                                                                                                                                                                                                                                                                                                                                                                                                                                                                                                                                                                                                                                                                                                   |           |
|----|-----------------------------------------------------------------------------------------------------------------------------------------------------------------------------------------------------------------------------------------------------------------------------------------------------------------------------------------------------------------------------------------------------------------------------------------------------------------------------------------------------------------------------------------------------------------------------------------------------------------------------------------------------------------------------------------------------------------------------------------------------------------------------------------------------------------------------------------------------------------------------------------------------------------------------------------------------------------------------------------------------------------------------------------------------------------------------------------------------------------------------------------------------------------------------------------------------------------------------------------------------------------------------------------------------------------------------------------------------------------------------------------------------------------------------------------------------------------------------------------------------------------------------------------------------------------------------------------------------------------------------------|-----------|
| #1 | (((osteoarthritis, knee [MeSH Terms] ) OR (Knee osteoarthritis [Title/Abstract] )) OR (Knee Osteoarthritis [Title/Abstract] )) OR (Osteoarthritis of Knee [Title/Abstract] )) OR (Osteoarthritis of the Knee [Title/Abstract] )                                                                                                                                                                                                                                                                                                                                                                                                                                                                                                                                                                                                                                                                                                                                                                                                                                                                                                                                                                                                                                                                                                                                                                                                                                                                                                                                                                                                   | 27,876    |
| #2 | ((((((((((((((((((((((((((((((((((((((((self care[MeSH Terms]) OR (Self care[Title/Abstract])) OR (Self monitoring[Title/Abstract])) OR (group, self help[MeSH Terms])) OR (groups, self help[MeSH Terms])) OR (Self help[Title/Abstract])) OR (Self efficacy[Title/Abstract])) OR (self efficacy[MeSH Terms])) OR (Self administration[Title/Abstract])) OR (Self monitor[Title/Abstract])) OR (self medication[MeSH Terms])) OR (self medications[MeSH Terms])) OR (self regulation[MeSH Terms])) OR (self regulations[MeSH Terms])) OR (Self regulation[Title/Abstract])) OR (Self treatment[Title/Abstract])) OR (Social support[MeSH Terms])) OR (Social support[Title/Abstract])) OR (adaptive behavior[MeSH Terms])) OR (Adaptive behavior[Title/Abstract])) OR (Behavior therapy[Title/Abstract])) OR (behavior therapy[MeSH Terms])) OR (behavior therapy, cognitive[MeSH Terms])) OR (Patient participation[Title/Abstract])) OR (Patient education[Title/Abstract])) OR (patient education[MeSH Terms])) OR (patient education as topic[MeSH Terms])) OR (health education[MeSH Terms])) OR (Health education[Title/Abstract])) OR (Educational therapy[Title/Abstract])) OR (Health communication[Title/Abstract])) OR (Disease management[Title/Abstract])) OR (disease management[MeSH Terms])) OR (Patient Care Management[Title/Abstract])) OR (Management program[Title/Abstract])) OR (Management plan[Title/Abstract])) OR (Self-Management[MeSH Terms])) OR (Self-Management[Title/Abstract])) OR (Self Management[Title/Abstract])) OR (self management[MeSH Terms])) OR (Management, Self[Title/Abstract])) | 785,583   |
| #3 | #1 AND #2                                                                                                                                                                                                                                                                                                                                                                                                                                                                                                                                                                                                                                                                                                                                                                                                                                                                                                                                                                                                                                                                                                                                                                                                                                                                                                                                                                                                                                                                                                                                                                                                                         | 1671      |
| #4 | (((((((Randomized Controlled Trial [Publication Type] ) OR (Clinical Trial [Publication Type] )) OR (Randomly [Title/Abstract] )) OR (Random [Title/Abstract] )) OR (Randomised [Title/Abstract] )) OR (Trial [Title/Abstract] )) OR (Control [Title/Abstract] )) OR (Controlled [Title/Abstract] )                                                                                                                                                                                                                                                                                                                                                                                                                                                                                                                                                                                                                                                                                                                                                                                                                                                                                                                                                                                                                                                                                                                                                                                                                                                                                                                               | 4,592,050 |
| #5 | #3 AND #4                                                                                                                                                                                                                                                                                                                                                                                                                                                                                                                                                                                                                                                                                                                                                                                                                                                                                                                                                                                                                                                                                                                                                                                                                                                                                                                                                                                                                                                                                                                                                                                                                         | 878       |
| #6 | Filters: MEDLINE                                                                                                                                                                                                                                                                                                                                                                                                                                                                                                                                                                                                                                                                                                                                                                                                                                                                                                                                                                                                                                                                                                                                                                                                                                                                                                                                                                                                                                                                                                                                                                                                                  | 834       |

### Embase

- |    |                                     |        |
|----|-------------------------------------|--------|
| #1 | 'knee osteoarthritis'/exp           | 37,135 |
| #2 | 'knee osteoarthritis':ab, ti        | 19,538 |
| #3 | 'Osteoarthritis of Knee':ab, ti     | 336    |
| #4 | 'Osteoarthritis of the Knee':ab, ti | 4,235  |
| #5 | #1 OR #2 OR #3 OR #4                | 40,875 |
| #6 | 'self care'/exp                     | 90,340 |
| #7 | 'self care':ab, ti                  | 28,407 |

|     |                                                                                                                                                                                                                   |           |
|-----|-------------------------------------------------------------------------------------------------------------------------------------------------------------------------------------------------------------------|-----------|
| #8  | 'self management':ab, ti                                                                                                                                                                                          | 30,356    |
| #9  | 'self management support'/exp                                                                                                                                                                                     | 21        |
| #10 | 'self monitoring':ab,ti                                                                                                                                                                                           | 10,810    |
| #11 | 'self monitoring'/exp                                                                                                                                                                                             | 8,356     |
| #12 | 'self help'/exp                                                                                                                                                                                                   | 14,439    |
| #13 | 'self help':ab,ti                                                                                                                                                                                                 | 8,839     |
| #14 | 'self efficacy':ab,ti                                                                                                                                                                                             | 38,280    |
| #15 | 'self administration':ab,ti                                                                                                                                                                                       | 13,991    |
| #16 | 'self medication'/exp                                                                                                                                                                                             | 11,391    |
| #17 | 'self medication':ab,ti                                                                                                                                                                                           | 6,133     |
| #18 | 'self regulation':ab,ti                                                                                                                                                                                           | 10,194    |
| #19 | 'self treatment':ab,ti                                                                                                                                                                                            | 2,024     |
| #20 | 'social support'/exp                                                                                                                                                                                              | 99,865    |
| #21 | 'social support':ab,ti                                                                                                                                                                                            | 53,573    |
| #22 | 'adaptive behavior'/exp                                                                                                                                                                                           | 61,889    |
| #23 | 'adaptive behavior':ab,ti                                                                                                                                                                                         | 3,931     |
| #24 | 'behavior therapy'/exp                                                                                                                                                                                            | 64,462    |
| #25 | 'behavior therapy':ab,ti                                                                                                                                                                                          | 7,015     |
| #26 | 'patient participation'/exp                                                                                                                                                                                       | 30,129    |
| #27 | 'patient education'/exp                                                                                                                                                                                           | 117,786   |
| #28 | 'patient education':ab,ti                                                                                                                                                                                         | 29,335    |
| #29 | 'health education'/exp                                                                                                                                                                                            | 350,025   |
| #30 | 'health education':ab,ti                                                                                                                                                                                          | 40,152    |
| #31 | 'disease management'/exp                                                                                                                                                                                          | 3,210,069 |
| #32 | 'disease management':ab,ti                                                                                                                                                                                        | 25,094    |
| #33 | 'management program':ab,ti                                                                                                                                                                                        | 10,925    |
| #34 | 'educational therapy':ab,ti                                                                                                                                                                                       | 149       |
| #35 | 'management plan':ab,ti                                                                                                                                                                                           | 7,539     |
| #36 | #6 OR #7 OR #8 OR #9 OR #10 OR #11 OR #12 OR #13 OR #14 OR #15 #16 OR #17 OR<br>#18 OR #19 OR #20 OR #21 OR #22 OR #23 OR #24 OR #25 #26 OR #27 OR #28 OR #29<br>OR #30 OR #31 OR #32 OR #33 OR #34 OR #35 OR #36 | 3,804,934 |
| #37 | 'randomized controlled trial'/exp                                                                                                                                                                                 | 678,249   |
| #38 | #5 AND #36 AND #37                                                                                                                                                                                                | 2,645     |

## **Cochrane Library**

|    |                                                           |        |
|----|-----------------------------------------------------------|--------|
| #1 | MeSH descriptor: [Osteoarthritis, Knee] explode all trees | 4,714  |
| #2 | ("knee osteoarthritis"): ti, ab, kw                       | 7,751  |
| #3 | ("Osteoarthritis of the Knee"): ti, ab, kw                | 2,120  |
| #4 | ("Osteoarthritis of Knee"): ti, ab, kw                    | 525    |
| #5 | #1 OR #2 OR #3 OR #4                                      | 10,686 |
| #6 | MeSH descriptor: [Self-Management] explode all trees      | 550    |
| #7 | ("self-management program"): ti, ab, kw                   | 1,279  |
| #8 | ("Self Management"): ti, ab, kw                           | 8,806  |

|     |                                                                                                                                                                        |        |
|-----|------------------------------------------------------------------------------------------------------------------------------------------------------------------------|--------|
| #9  | ("Self care"):ti,ab,kw                                                                                                                                                 | 11,933 |
| #10 | ("Self monitoring"):ti,ab,kw                                                                                                                                           | 4,899  |
| #11 | ("self help group"):ti,ab,kw                                                                                                                                           | 920    |
| #12 | ("Self administration"):ti,ab,kw                                                                                                                                       | 2,008  |
| #13 | ("Self monitor"):ti,ab,kw                                                                                                                                              | 4,898  |
| #14 | MeSH descriptor: [Self Efficacy] explode all trees                                                                                                                     | 3,313  |
| #15 | ("Self medication"):ti,ab,kw                                                                                                                                           | 491    |
| #16 | MeSH descriptor: [Self-Control] explode all trees                                                                                                                      | 312    |
| #17 | ("Self regulation"):ti,ab,kw                                                                                                                                           | 2,045  |
| #18 | ("Self treatment"):ti,ab,kw                                                                                                                                            | 232    |
| #19 | MeSH descriptor: [Social Support] explode all trees                                                                                                                    | 3,439  |
| #20 | ("Adaptive behavior"):ti,ab,kw                                                                                                                                         | 866    |
| #21 | MeSH descriptor: [Behavior Therapy] explode all trees                                                                                                                  | 17,646 |
| #22 | MeSH descriptor: [Patient Education as Topic] explode all trees                                                                                                        | 9,150  |
| #23 | MeSH descriptor: [Health Education] in all MeSH products                                                                                                               | 20,741 |
| #24 | ("Educational therapy"):ti,ab,kw                                                                                                                                       | 95     |
| #25 | ("Patient education"):ti,ab,kw                                                                                                                                         | 14,318 |
| #26 | ("Health education"):ti,ab,kw                                                                                                                                          | 11,340 |
| #27 | MeSH descriptor: [Disease Management] explode all trees                                                                                                                | 5,030  |
| #28 | ("Management program"):ti,ab,kw                                                                                                                                        | 4,069  |
| #29 | ("Management plan"):ti,ab,kw                                                                                                                                           | 645    |
| #30 | #6 OR #7 OR #8 OR #9 OR #10 OR #11 OR #12 OR #13 OR #14 OR #15 OR #16 OR #17<br>OR #18 OR #19 OR #20 OR #21 OR #22 OR #23 OR #24 OR #25 OR #26 OR #27 OR #28<br>OR #29 | 63,305 |
| #31 | #5 AND #30                                                                                                                                                             | 681    |

## Web of Science

|     |                                        |         |
|-----|----------------------------------------|---------|
| #1  | TS = Knee osteoarthritis               | 67,385  |
| #2  | TI = Knee osteoarthritis               | 19,028  |
| #3  | TS = Osteoarthritis of Knee            | 63,064  |
| #4  | TI = Osteoarthritis of Knee            | 13,925  |
| #5  | TS = Osteoarthritis of the Knee        | 59,204  |
| #6  | TI = Osteoarthritis of the Knee        | 8,036   |
| #7  | TI = KOA                               | 218     |
| #8  | #1 OR #2 OR #3 OR #4 OR #5 OR #6 OR #7 | 67,551  |
| #9  | TS = (Self Management)                 | 171,200 |
| #10 | TI = (Self Management)                 | 14,099  |
| #11 | AB = (Self Management)                 | 83,540  |
| #12 | TS = (Self-Management)                 | 35,594  |
| #13 | TI = (Self-Management)                 | 11,057  |
| #14 | AB = (Self-Management )                | 23,126  |
| #15 | TS=(Self care)                         | 247,369 |
| #16 | TI=(Self care)                         | 12,663  |

|     |                                                                                                                                                                                                                                                          |           |
|-----|----------------------------------------------------------------------------------------------------------------------------------------------------------------------------------------------------------------------------------------------------------|-----------|
| #17 | <i>TI=(Self monitoring)</i>                                                                                                                                                                                                                              | 5,056     |
| #18 | <i>TS=(Self monitoring)</i>                                                                                                                                                                                                                              | 86,560    |
| #19 | <i>TS=(Self help)</i>                                                                                                                                                                                                                                    | 112,981   |
| #20 | <i>TI=(Self help)</i>                                                                                                                                                                                                                                    | 3,742     |
| #21 | <i>TI=(Self administration)</i>                                                                                                                                                                                                                          | 5,455     |
| #22 | <i>TS=(Self administration)</i>                                                                                                                                                                                                                          | 110,323   |
| #23 | <i>TS=(Self monitor)</i>                                                                                                                                                                                                                                 | 86,560    |
| #24 | <i>TI=(Self monitor)</i>                                                                                                                                                                                                                                 | 5,056     |
| #25 | <i>TI=(Self regulation)</i>                                                                                                                                                                                                                              | 5,637     |
| #26 | <i>TS=(Self regulation)</i>                                                                                                                                                                                                                              | 83,505    |
| #27 | <i>TS=(Self treatment)</i>                                                                                                                                                                                                                               | 322,687   |
| #28 | <i>TI=(Self treatment)</i>                                                                                                                                                                                                                               | 6,652     |
| #29 | <i>TI=(Social support)</i>                                                                                                                                                                                                                               | 17,106    |
| #30 | <i>TS=(Social support)</i>                                                                                                                                                                                                                               | 339,944   |
| #31 | <i>TS=(Behavior therapy)</i>                                                                                                                                                                                                                             | 1,222,962 |
| #32 | <i>TI=(Behavior therapy)</i>                                                                                                                                                                                                                             | 6,628     |
| #33 | <i>TI=(Patient education)</i>                                                                                                                                                                                                                            | 14,522    |
| #34 | <i>TS=(Patient education)</i>                                                                                                                                                                                                                            | 364,869   |
| #35 | <i>TS=(Health education)</i>                                                                                                                                                                                                                             | 592,229   |
| #36 | <i>TI=(Health education)</i>                                                                                                                                                                                                                             | 25,203    |
| #37 | <i>TI=(Educational therapy)</i>                                                                                                                                                                                                                          | 522       |
| #38 | <i>TS=(Educational therapy)</i>                                                                                                                                                                                                                          | 59,869    |
| #39 | <i>TS=(Disease management)</i>                                                                                                                                                                                                                           | 1,211,615 |
| #40 | <i>TI=(Disease management)</i>                                                                                                                                                                                                                           | 35,208    |
| #41 | <i>TI=(Management program)</i>                                                                                                                                                                                                                           | 13,800    |
| #42 | <i>TS=(Management program)</i>                                                                                                                                                                                                                           | 378,355   |
| #43 | <i>#9 OR #10 OR #11 OR #12 OR #13 OR #14 OR #15 OR #16 OR #17 OR #18 OR #19 OR #20<br/>OR #21 OR #22 OR #23 OR #24 OR #25 OR #26 OR #27 OR #28 OR #29 OR #30 OR #31<br/>OR #32 OR #33 OR #34 OR #35 OR #36 OR #37 OR #38 OR #39 OR #40 OR #41 OR #42</i> | 4,085,871 |
| #44 | <i>TS = Randomized Controlled Trial</i>                                                                                                                                                                                                                  | 625,393   |
| #45 | <i>TI = Randomized Controlled Trial</i>                                                                                                                                                                                                                  | 137,466   |
| #46 | <i>#44 OR #45</i>                                                                                                                                                                                                                                        | 625,393   |
| #47 | <i>#8 AND #43 AND #46</i>                                                                                                                                                                                                                                | 1,974     |
