# Supplementary material for: Self-Management for Knee Osteoarthritis: A Systematic Review and Meta-Analysis of Randomized Controlled Trials
Source: Pain Res Manag. 2022 Mar 2;2022:2681240. doi: 10.1155/2022/2681240 (PMC8906975; doi:10.1155/2022/2681240)
Supplement: Supplementary Materials — Supplementary material can be found in the appendix of this article. The manuscript contains a supplementary material, which is a detailed search strategy for four databases. [file 2681240.f1.zip]

Archive with 2 entries (2 files):
- 2681240.f1/PRISMA_2020_checklist.pdf
- 2681240.f1/Search algorithm (1).pdf
